# Supplementary material for: Insights into the hyperglycosylation of human chorionic gonadotropin revealed by glycomics analysis
Source: PubMed Central journal article supplement (PMC7012436; doi:10.1371/journal.pone.0228507), 2020-02-11
Supplement: pone.0228507.s002.pdf [file pone.0228507.s002.pdf]

**S2 Table.** NanoLC-MS/MS analysis of hCG-4 GTD10a

Raw data peak picking was performed using Mascot.dll v1.6.0.13 (Applied Biosystems) and Mascot (version 2.6, www.matrixscience.com) was used to search the NCBIProt database for sequences consistent with the MS/MS fragment ions. Peak list generation and database searching were conducted with the default parameters. MS/MS data were used to search the *Homo sapiens* portion of the NCBIProt protein database with the following parameters: monoisotopic peptide masses, allowing for partial oxidation of methionine residues and carboxymethylation of cysteine residues, mass tolerance of 300 ppm. and fragment ion tolerance of 300 ppm. Tryptic digests of up to 1 missed cleavage were tolerated. Proteins listed contain 3 or more peptides with ion scores higher than 38, which indicates identity or extensive sequence similarity ( $p < 0.05$ ).

| Accession (NCBIProt) | Description                                                              | Peptides Matched | Total Ion Score |
|----------------------|--------------------------------------------------------------------------|------------------|-----------------|
| BAF64541.1           | immunoglobulin light chain, partial                                      | 10               | 548             |
| BAC01722.1           | immunoglobulin kappa light chain VLJ region, partial                     | 9                | 533             |
| AMT74553.1           | immunoglobulin light chain VRC01c-HuGL, partial                          | 6                | 360             |
| AMT74548.1           | immunoglobulin light chain VRC01c-HuGL, partial                          | 6                | 354             |
| QEP27269.1           | IG c1147_light_IGKV3-20_IGKJ5, partial                                   | 4                | 258             |
| AAW69278.1           | anti-tetanus toxoid immunoglobulin light chain variable region, partial  | 5                | 240             |
| P00450.1             | RecName: Full=Ceruloplasmin; AltName: Full=Ferroxidase; Flags: Precursor | 10               | 377             |
| NP_001638.1          | apolipoprotein D precursor                                               | 6                | 330             |
| CAA68763.1           | glucan 1, 4-alpha-glucosidase                                            | 8                | 330             |
| NP_001954.2          | pro-epidermal growth factor isoform 1 preproprotein                      | 7                | 307             |
| NP_000884.1          | kininogen-1 isoform 2 precursor                                          | 6                | 281             |
| 1HCN_B               | Chain B, HUMAN CHORIONIC GONADOTROPIN                                    | 4                | 264             |
| 1HCN_A               | Chain A, HUMAN CHORIONIC GONADOTROPIN                                    | 3                | 254             |
| EAX00393.1           | glutaminy-peptide cyclotransferase (glutaminy cyclase), isoform CRA_b    | 4                | 240             |
| NP_001076.2          | alpha-1-antichymotrypsin precursor                                       | 4                | 212             |
| NP_002769.1          | prosaposin isoform a preproprotein                                       | 5                | 209             |
| BAB71634.1           | unnamed protein product                                                  | 5                | 198             |
| ABU90693.2           | immunoglobulin lambda 1 light chain, partial                             | 4                | 164             |
| NP_000053.2          | plasma protease C1 inhibitor precursor                                   | 5                | 190             |
| NP_004516.2          | low-density lipoprotein receptor-related protein 2 precursor             | 7                | 173             |
| NP_001072.2          | cubilin precursor                                                        | 4                | 171             |
| AAA35692.1           | complement cytolysis inhibitor precursor                                 | 4                | 164             |
| NP_000396.2          | ganglioside GM2 activator isoform 1 precursor                            | 4                | 163             |
| NP_005214.2          | deoxyribonuclease-1 precursor                                            | 3                | 162             |
| AAA36799.1           | uromodulin                                                               | 4                | 160             |
| NP_000395.3          | beta-galactosidase isoform a preproprotein                               | 4                | 152             |
| NP_001900.1          | cathepsin D preproprotein                                                | 3                | 143             |
| NP_000254.2          | alpha-N-acetylglucosaminidase precursor                                  | 4                | 133             |
| EAX00084.1           | hCG16977, isoform CRA_c                                                  | 3                | 131             |
| NP_000604.1          | hemopexin precursor                                                      | 3                | 112             |
