# Supplementary material for: Insights into the hyperglycosylation of human chorionic gonadotropin revealed by glycomics analysis
Source: PubMed Central journal article supplement (PMC7012436; doi:10.1371/journal.pone.0228507), 2020-02-11
Supplement: pone.0228507.s003.pdf [file pone.0228507.s003.pdf]

**S3 Table. Normal distribution for paired samples t-test.** Normal distribution test for the difference ( $\Delta$ ) between early (EP-hCG) and late (LP-hCG) pregnancy variables (structural features) using the Shapiro-Wilk statistic.

| Variable (str. feature)   | Tests of Normality        |    |      |
|---------------------------|---------------------------|----|------|
|                           | Shapiro-Wilk<br>Statistic | df | Sig. |
| $\Delta$ LacNAc           | .967                      | 3  | .650 |
| $\Delta$ NeuAc            | .999                      | 3  | .928 |
| $\Delta$ LewisX           | .815                      | 3  | .152 |
| $\Delta$ Agalactosylated  | .803                      | 3  | .122 |
| $\Delta$ core-Fucosylated | .941                      | 3  | .532 |
| $\Delta$ Bisected         | .780                      | 3  | .068 |
| $\Delta$ Mono-antennary   | .995                      | 3  | .868 |
| $\Delta$ Bi-antennary     | .975                      | 3  | .697 |
| $\Delta$ Tri-antennary    | .962                      | 3  | .624 |
| $\Delta$ Tetra-antennary  | .920                      | 3  | .452 |
| $\Delta$ High Mannose     | .790                      | 3  | .092 |
