# Supplementary material for: Insights into the hyperglycosylation of human chorionic gonadotropin revealed by glycomics analysis
Source: PubMed Central journal article supplement (PMC7012436; doi:10.1371/journal.pone.0228507), 2020-02-11
Supplement: pone.0228507.s004.pdf [file pone.0228507.s004.pdf]

**S4 Table. Paired samples *t*-test analysis for EP-hCG and LP-hCG samples.** Variables from EP-hCG (E) and LP-hCG samples (L) meeting normal distribution (**Supplemental Table S1**) were subjected to paired samples *t*-test. Value in bold correspond to variable significant at  $P < 0.05$ .

| Paired Samples Test                |                         |           |                |            |                                           |           |
|------------------------------------|-------------------------|-----------|----------------|------------|-------------------------------------------|-----------|
| Paired Differences                 |                         |           |                |            |                                           |           |
| Pairs of variables (str. features) |                         | Mean      | Std. Deviation | Std. Error | 95% Confidence Interval of the Difference |           |
|                                    |                         |           |                |            | Mean                                      | Lower     |
| Pair 1                             | E-LacNAc - L-LacNAc     | -5.25333  | 7.39885        | 4.27173    | -23.63310                                 | 13.12644  |
| Pair 2                             | E-NeuAc - L-NeuAc       | 9.58667   | 9.77698        | 5.64474    | -14.70071                                 | 33.87404  |
| Pair 3                             | E-LewisX - L-LewisX     | -4.33000  | 3.02331        | 1.74551    | -11.84032                                 | 3.18032   |
| Pair 4                             | E-Agalac* - L-Agalac    | -5.32333  | 8.71484        | 5.03152    | -26.97220                                 | 16.32553  |
| Pair 5                             | E-Core-F - L-Core-F     | -6.28000  | 12.39481       | 7.15615    | -37.07041                                 | 24.51041  |
| Pair 6                             | E-Bisected - L-Bisected | -21.30667 | 2.95231        | 1.70452    | -28.64061                                 | -13.97272 |
| Pair 7                             | E-Mono - L-Mono         | 8.70000   | 9.05150        | 5.22589    | -13.78518                                 | 31.18518  |
| Pair 8                             | E-Bi - L-Bi             | -5.87667  | 3.74209        | 2.16050    | -15.17253                                 | 3.41920   |
| Pair 9                             | E-Tri - L-Tri           | -3.13000  | 3.89528        | 2.24894    | -12.80641                                 | 6.54641   |
| Pair 10                            | E-Tetra - L-Tetra       | .31000    | 1.57572        | .90974     | -3.60431                                  | 4.22431   |
| Pair 11                            | E-HM - L-HM             | 11.90000  | 20.29709       | 11.71853   | -38.52076                                 | 62.32076  |

| Paired Samples Test                |                         |         |    |                 |
|------------------------------------|-------------------------|---------|----|-----------------|
| Pairs of variables (str. features) |                         | t       | df | Sig. (2-tailed) |
| Pair 1                             | E-LacNAc - L-LacNAc     | -1.230  | 2  | .344            |
| Pair 2                             | E-NeuAc - L-NeuAc       | 1.698   | 2  | .232            |
| Pair 3                             | E-LewisX - L-LewisX     | -2.481  | 2  | .131            |
| Pair 4                             | E-Agalac - L-Agalac     | -1.058  | 2  | .401            |
| Pair 5                             | E-Core-F - L-Core-F     | -.878   | 2  | .473            |
| Pair 6                             | E-Bisected - L-Bisected | -12.500 | 2  | <b>.006</b>     |
| Pair 7                             | E-Mono - L-Mono         | 1.665   | 2  | .238            |
| Pair 8                             | E-Bi - L-Bi             | -2.720  | 2  | .113            |
| Pair 9                             | E-Tri - L-Tri           | -1.392  | 2  | .299            |
| Pair 10                            | E-Tetra - L-Tetra       | .341    | 2  | .766            |
| Pair 11                            | E-HM - L-HM             | 1.015   | 2  | .417            |

\* Agalac, Agalactosylated; Core-F, Core-fucosylated; Mono, mono-antennary; Bi, bi-antennary; Tri, tri-antennary; Tetra, tetra-antennary; HM, high mannose.
