# Supplementary material for: Insights into the hyperglycosylation of human chorionic gonadotropin revealed by glycomics analysis
Source: PubMed Central journal article supplement (PMC7012436; doi:10.1371/journal.pone.0228507), 2020-02-11
Supplement: pone.0228507.s005.pdf [file pone.0228507.s005.pdf]

**S5 Table. Normal distribution test for independent samples t-test.** Variables (structural features) deriving from the EP-hCG and GTD-hCG were subjected to the Shapiro-Wilk statistic. Values in bold correspond to variables significant at  $P < 0.05$  (not meeting normal distribution assumption). Note that high mannose (**HM**) and bi-antennary N-glycans (**Bi-**) did not meet the normal distribution assumption and therefore they were excluded from further analysis.

|                         |         | Tests of Normality |    |             |
|-------------------------|---------|--------------------|----|-------------|
| Variable (str. feature) | Group   | Shapiro-Wilk       |    |             |
|                         |         | Statistic          | df | Sig.        |
| <b>High Mannose</b>     | EP-hCG  | .765               | 3  | <b>.032</b> |
|                         | GTD-hCG | .851               | 4  | .230        |
| Mono-antennary          | EP-hCG  | .995               | 3  | .868        |
|                         | GTD-hCG | .920               | 4  | .537        |
| <b>Bi-antennary</b>     | EP-hCG  | .755               | 3  | <b>.011</b> |
|                         | GTD-hCG | .869               | 4  | .294        |
| Tri-antennary           | EP-hCG  | .794               | 3  | .101        |
|                         | GTD-hCG | .918               | 4  | .528        |
| Tetra-antennary         | EP-hCG  | .938               | 3  | .521        |
|                         | GTD-hCG | .830               | 4  | .168        |
| Agalactosylated         | EP-hCG  | .787               | 3  | .085        |
|                         | GTD-hCG | .917               | 4  | .519        |
| Core-Fucosylated        | EP-hCG  | 1.000              | 3  | .985        |
|                         | GTD-hCG | .809               | 4  | .120        |
| Bisected                | EP-hCG  | .944               | 3  | .544        |
|                         | GTD-hCG | .891               | 4  | .388        |
| LacNAc                  | EP-hCG  | .841               | 3  | .217        |
|                         | GTD-hCG | .943               | 4  | .675        |
| NeuAc                   | EP-hCG  | .988               | 3  | .794        |
|                         | GTD-hCG | .938               | 4  | .642        |
| LewisX                  | EP-hCG  | .993               | 3  | .845        |
|                         | GTD-hCG | .953               | 4  | .737        |
