# Supplementary material for: Insights into the hyperglycosylation of human chorionic gonadotropin revealed by glycomics analysis
Source: PubMed Central journal article supplement (PMC7012436; doi:10.1371/journal.pone.0228507), 2020-02-11
Supplement: pone.0228507.s006.pdf [file pone.0228507.s006.pdf]

**S6 Table. Independent samples *t*-test analysis for EP-hCG and GTD-hCG samples.**

Variables from EP-hCG and GTD-hCG samples meeting normal distribution (**Supplemental Table S3**) were subjected to independent samples *t*-test. Note that mono-antennary (**Mono-**) and agalactosylated (**Agalacto**) N-glycans were not found statistically significant ( $P=0.402$  and  $P=0.092$  respectively). Values in bold correspond to variables significant at  $P<0.05$  for the equality of variances (var.) and equality of means.

| Variable (structural feature) |                        | Independent Samples Test                |             | t-test for Equality of Means |       |                 |
|-------------------------------|------------------------|-----------------------------------------|-------------|------------------------------|-------|-----------------|
|                               |                        | Levene's Test for Equality of Variances |             | t                            | df    | Sig. (2-tailed) |
|                               |                        | F                                       | Sig.        |                              |       |                 |
| <b>Mono-antennary</b>         | Equal var. assumed     | .710                                    | .438        | -.915                        | 5     | .402            |
|                               | Equal var. not assumed |                                         |             | -.835                        | 2.932 | .466            |
| Tri-antennary                 | Equal var. assumed     | .353                                    | .578        | 3.795                        | 5     | <b>.013</b>     |
|                               | Equal var. not assumed |                                         |             | 3.915                        | 4.872 | .012            |
| Tetra-antennary               | Equal var. assumed     | 3.712                                   | .112        | 2.996                        | 5     | <b>.030</b>     |
|                               | Equal var. not assumed |                                         |             | 2.631                        | 2.459 | .096            |
| <b>Agalactosylated</b>        | Equal var. assumed     | 7.057                                   | <b>.045</b> | 3.125                        | 5     | .026            |
|                               | Equal var. not assumed |                                         |             | 2.729                        | 2.398 | .092            |
| Core-Fucosylated              | Equal var. assumed     | 2.218                                   | .197        | 5.235                        | 5     | <b>.003</b>     |
|                               | Equal var. not assumed |                                         |             | 4.530                        | 2.303 | .035            |
| Bisected                      | Equal var. assumed     | .482                                    | .518        | 6.542                        | 5     | <b>.001</b>     |
|                               | Equal var. not assumed |                                         |             | 7.064                        | 4.912 | .001            |
| LacNAc                        | Equal var. assumed     | .071                                    | .801        | 6.874                        | 5     | <b>.001</b>     |
|                               | Equal var. not assumed |                                         |             | 7.207                        | 4.982 | .001            |
| NeuAc                         | Equal var. assumed     | .636                                    | .461        | -8.421                       | 5     | <b>.001</b>     |
|                               | Equal var. not assumed |                                         |             | -9.333                       | 4.545 | .000            |
| LewisX                        | Equal var. assumed     | 3.775                                   | .110        | 4.726                        | 5     | <b>.005</b>     |
|                               | Equal var. not assumed |                                         |             | 4.036                        | 2.177 | .049            |

**S6 Table (continued). Independent samples t-test analysis for EP-hCG and GTD-hCG samples.**

| Variable (structural feature) |                        | Independent Samples Test     |                       |                                           |           |
|-------------------------------|------------------------|------------------------------|-----------------------|-------------------------------------------|-----------|
|                               |                        | t-test for Equality of Means |                       |                                           |           |
|                               |                        | Mean Difference              | Std. Error Difference | 95% Confidence Interval of the Difference |           |
|                               |                        |                              |                       | Lower                                     | Upper     |
| <b>Mono-antennary</b>         | Equal var. assumed     | -4.60333                     | 5.02841               | -17.52928                                 | 8.32261   |
|                               | Equal var. not assumed | -4.60333                     | 5.51262               | -22.37806                                 | 13.17139  |
| Tri-antennary                 | Equal var. assumed     | 10.84250                     | 2.85686               | 3.49870                                   | 18.18630  |
|                               | Equal var. not assumed | 10.84250                     | 2.76920               | 3.66721                                   | 18.01779  |
| Tetra-antennary               | Equal var. assumed     | 3.09417                      | 1.03294               | .43892                                    | 5.74941   |
|                               | Equal var. not assumed | 3.09417                      | 1.17610               | -1.16084                                  | 7.34918   |
| <b>Agalactosylated</b>        | Equal var. assumed     | 18.83583                     | 6.02826               | 3.33969                                   | 34.33198  |
|                               | Equal var. not assumed | 18.83583                     | 6.90195               | -6.59952                                  | 44.27119  |
| Core-Fucosylated              | Equal var. assumed     | 26.27583                     | 5.01969               | 13.37232                                  | 39.17935  |
|                               | Equal var. not assumed | 26.27583                     | 5.80072               | 4.21174                                   | 48.33992  |
| Bisected                      | Equal var. assumed     | 17.19833                     | 2.62872               | 10.44099                                  | 23.95568  |
|                               | Equal var. not assumed | 17.19833                     | 2.43466               | 10.90616                                  | 23.49050  |
| LacNAc                        | Equal var. assumed     | 43.60750                     | 6.34409               | 27.29950                                  | 59.91550  |
|                               | Equal var. not assumed | 43.60750                     | 6.05074               | 28.03655                                  | 59.17845  |
| NeuAc                         | Equal var. assumed     | -52.16833                    | 6.19531               | -68.09387                                 | -36.24279 |
|                               | Equal var. not assumed | -52.16833                    | 5.58966               | -66.98012                                 | -37.35654 |
| LewisX                        | Equal var. assumed     | 8.56417                      | 1.81226               | 3.90561                                   | 13.22272  |
|                               | Equal var. not assumed | 8.56417                      | 2.12182               | .11048                                    | 17.01785  |
