# Supplementary material for: Insights into the hyperglycosylation of human chorionic gonadotropin revealed by glycomics analysis
Source: PubMed Central journal article supplement (PMC7012436; doi:10.1371/journal.pone.0228507), 2020-02-11
Supplement: pone.0228507.s007.pdf [file pone.0228507.s007.pdf]

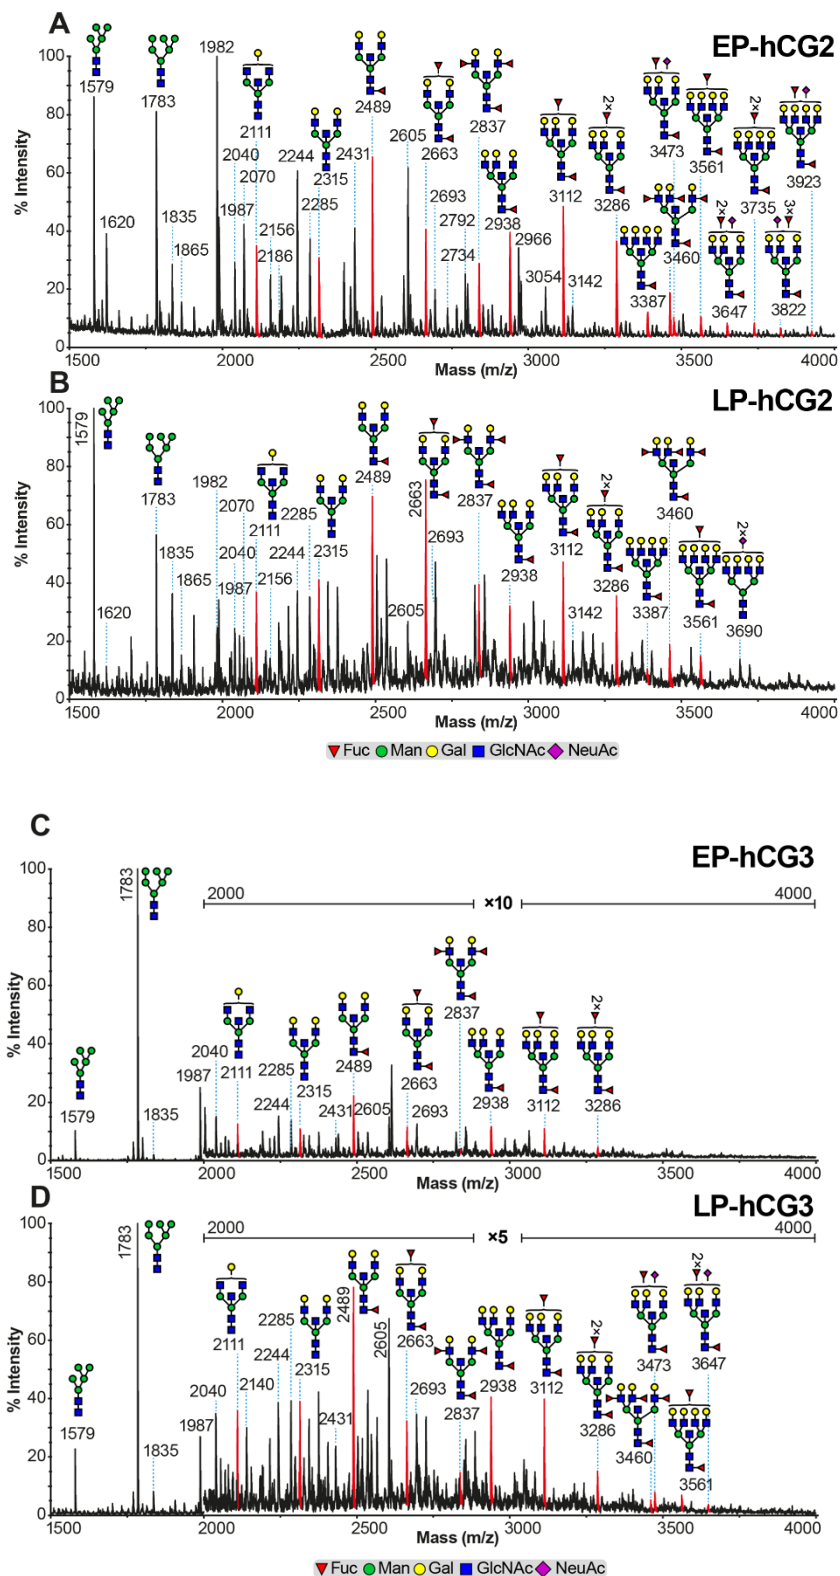

**S1 Fig. N-glycomic profiles of hCG samples.** MALDI-TOF MS spectra of permethylated N-glycans derived from (A) EP-hCG2, (B) LP-hCG2, (C) EP-hCG3 and (D) LP-hCG3 samples. Structures above a bracket were not unequivocally defined. Red peaks correspond to bisected N-glycans with various antenna configurations. (C, D) Horizontal line above the

spectra indicates the area and the level of zoom. Putative structures are based on composition, tandem MS,  $\beta$ -galactosyltransferase experiment and knowledge of biosynthetic pathways. All molecular ions are  $[M+Na]^+$ .
