# Supplementary material for: Insights into the hyperglycosylation of human chorionic gonadotropin revealed by glycomics analysis
Source: PubMed Central journal article supplement (PMC7012436; doi:10.1371/journal.pone.0228507), 2020-02-11
Supplement: pone.0228507.s008.pdf [file pone.0228507.s008.pdf]

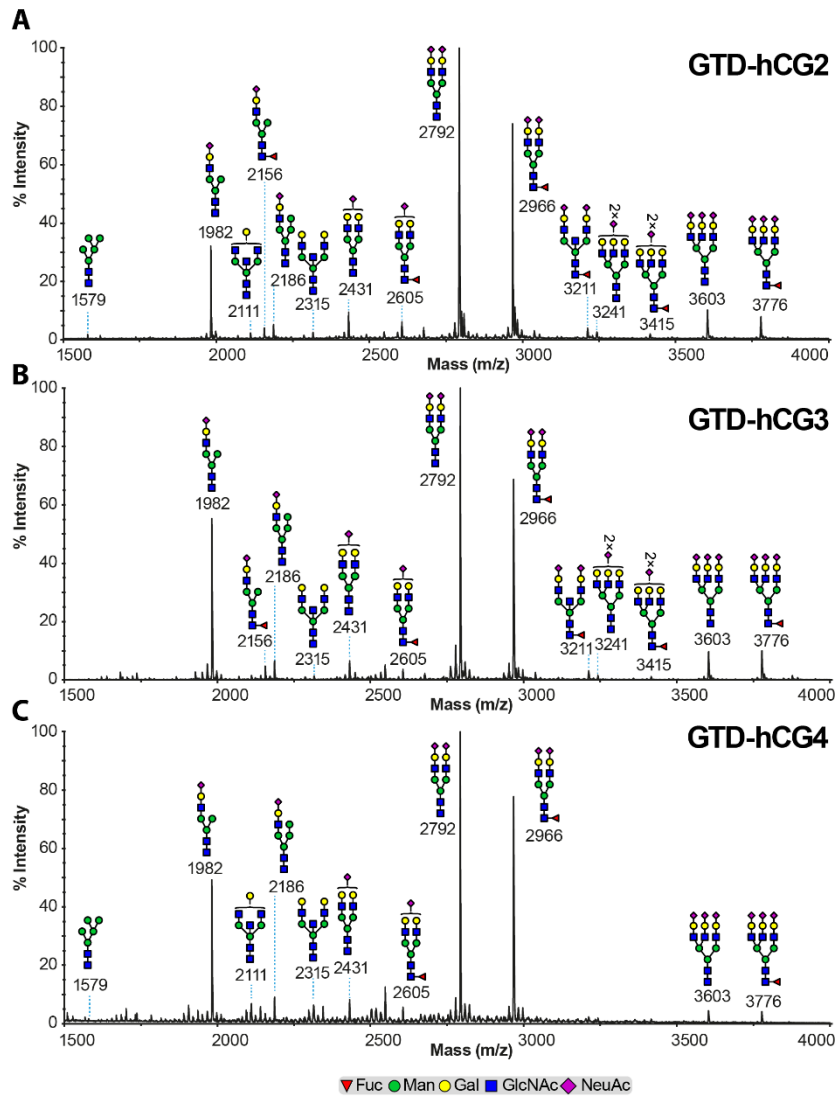

**S2 Fig. N-glycomic profiles of GTD-hCG samples.** MALDI-TOF MS spectra of permethylated N-glycans derived from (A) GTD-hCG2, (B) GTD-hCG3 and (C) GTD-hCG4 samples. Structures above a bracket were not unequivocally defined. Putative structures are based on composition, tandem MS. All molecular ions are  $[M+Na]^+$ .
