# Supplementary material for: Insights into the hyperglycosylation of human chorionic gonadotropin revealed by glycomics analysis
Source: PubMed Central journal article supplement (PMC7012436; doi:10.1371/journal.pone.0228507), 2020-02-11
Supplement: pone.0228507.s009.pdf [file pone.0228507.s009.pdf]

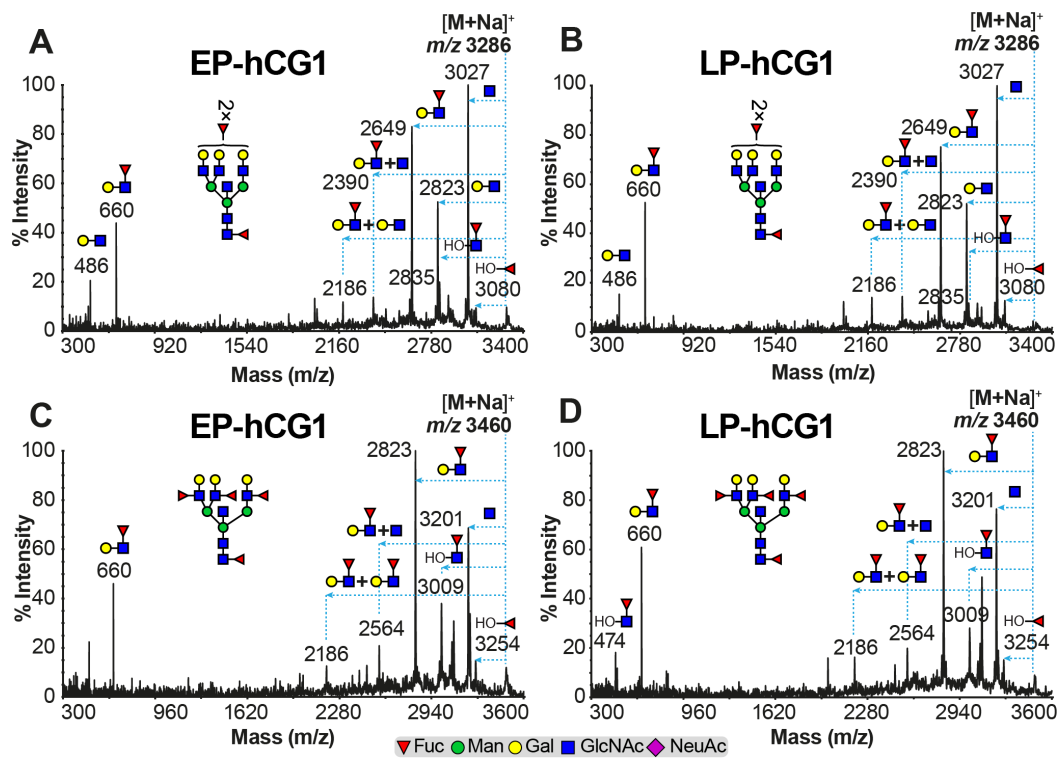

**S3 Fig. EP and LP hCG samples contain Lewis<sup>x</sup> antigens.** Representative MALDI-TOF/TOF MS/MS spectra of the molecular ions found at (A, B)  $m/z$  3286 and (C, D) 3460 for the EP and LP-hCG1 samples respectively. Horizontal dashed lines correspond to indicated losses from the molecular ion  $[M+Na]^+$ . For (A and B), the fragment ion at  $m/z$  3080 corresponds to the elimination of a fucose residue from the molecular ion at  $m/z$  3286, indicative of a fucose residue being on the C3 of GlcNAc residue (Lewis-X). Similarly, for (C and D), the fragment ion at  $m/z$  3254, corresponds to the elimination of a fucose residue from the molecular ion at  $m/z$  3460.
