# Supplementary material for: Insights into the hyperglycosylation of human chorionic gonadotropin revealed by glycomics analysis
Source: PubMed Central journal article supplement (PMC7012436; doi:10.1371/journal.pone.0228507), 2020-02-11
Supplement: pone.0228507.s011.pdf [file pone.0228507.s011.pdf]

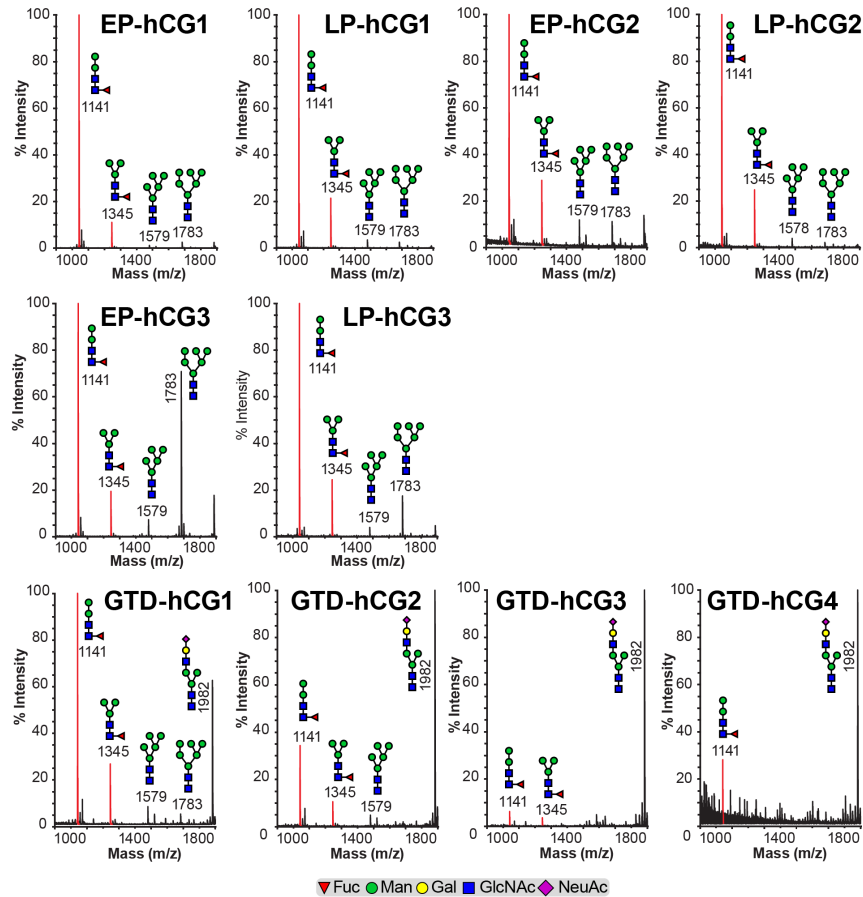

**S5 Fig. Paucimannose type N-glycans on hCG samples.** Partial MALDI-TOF MS spectra of permethylated N-glycans derived from EP-hCG, LP-hCG and GTD-hCG samples as indicated on the corresponding spectra. Red peaks correspond to paucimannose type N-glycans. For comparison of the relative intensity of the paucimannose type N-glycans compared to the relative intensity of molecular ions as shown in **Fig. 1** and **Supplemental Fig. 1**, compare the ratio of paucimannose type N-glycans to the high mannose N-glycans found at  $m/z$  1579 and 1783. All molecular ions are  $[M+Na]^+$ .
